# Supplementary material for: General anesthesia in children and long-term neurodevelopmental deficits: A systematic review
Source: Front Mol Neurosci. 2022 Sep 27;15:972025. doi: 10.3389/fnmol.2022.972025 (PMC9551616; doi:10.3389/fnmol.2022.972025)
Supplement: Supplementary file 2 [file Data_Sheet_2.xlsx]

## Sheet: Sheet1
Numbers	study ID	country of origin	publication	publication time	study subjects			study design	data source	age at exposure	age at follow-up	Reason for Anaesthesia (surgery, diagnostics etc.)	Type of anaesthetic,dosage, duration	Outcome accessed
					multiple-exposed	single-exposed	control
1	Hu et al.	USA	Anesthesiology	2017.8	116	457	463	retrospective cohort study	Birth cohort Olmsted County, Minnesota(1996-2000)	＜3yr	14-18yr	Otorhinolaryngogic-, Neurologic-, Urologic-, Orthopedic-, Plastics-, Cardiovascular- and some other surgeries	inhalated agents: sevoflurane,isoflurane i.v. agents:Thiopental Others:Nitrous oxide，opioids	(1)LD(reading, mathematic, and written) (2)ADHD (3)Individualized Education Programs for Speech/Language (IEP-SL) and Emotional/Behavioral Disorder (IEP-EBD) (4)Group-administered ability and achievement tests (Stanford and OLSAT)
2	Lena et al.	USA	JAMA	2016.7	0	105	105	Sibling-matched cohort study	4 university-based US pediatric tertiary care hospitals(2009-2015)	＜3yr	8-15yr	inguinal hernia surgery	premedication:midazolam inhalated agents: sevoflurane,isoflurane i.v. agents:propofol, thiopental, ketamine, and midazolam Others:Nitrous oxide Mean anaesthesia duration: 84min(20-240min)	(1)PANDA neuropsychological battery(IQ) (2)CBCL and ABAS-II scores
3	Graham et al.	Canada	Anesthesiology	2016.1	620	3850	13586	Retrospective matched cohort study	Manitoba Population Health Research Data Repository	＜4yr	In Kindergarten	dental, ENT, general surgery, ophthalmology, orthopaedics, plastic surgery, urology, neurosurgery	Not stated	EDI
4	Warner et al.	USA	Anesthesiology	2018.7	206	380	411	retrospective cohort study	Birth cohort Olmsted County, Minnesota(1994-2007)	＜3yr	8-12y,15-20y	otorhinolaryngologic,cardiovascular,neurologic,urologic,orthopedic,Plastic and other surgeries	sevoflurane，nitrous oxide Mean anethesia duration: 45min(single);187min(multiple)	(1)FSIQ(WASI) (2)a comprehensive neuropsychological assessment(WRAML-2，DKEFS,Wisconsin Card Sorting， CTOPP，BNT,Beery Motor Coordination,VMI，and Beery Visual Perception）and parent reports
5	DiMaggio et al.	USA	Anesth Analg.	2011.11	304		10146	Retrospective sibling-matched birth cohort study	New York State Medicaid Analytic Extract (MAX) files(1999-2005)	＜3yr	average age at diagnosis 10 / 18 months (unexposed/exposed)	Inguinal hernia repair,repair of gastroschisis,exploratory laparotomy,appendectomy, and some other surgeries	Not stated	ICD-9 codes: -ASD -unsocial/social conduct disorders -developmental delay -reading and language disorders -ADHS -other emotional or conduct disorders
6	O'Leary et al.	Canada	Anesthesiology	2016.8	28366		55910	Population-based, retrospective cohort study	in Ontario, Canada, by linking provincial health adminis trative databases to children’s developmental outcomes measured by the Early Development Instrument (EDI)(2004-2006, 2007-2009, 2010-2012)	<6yr	5-6y（Mean 5.7yr）	myringotomy and tube placement，excision of tonsils and adenoids/tonsillectomy，circumcision，repair of muscles of the chest and abdomen	Not stated	EDI
7	Schüttler et al.	Germany	Dtsch Arztebl Int.	2021.12	93	347	67	controlled cross-sectional study	who had surgeries at Erlangen University Hospital,Germany(2007–2011)	＜3yr	7-11yr	Not stated	i.v.>inhalation GA>LA i.v. agents:propofol,esketamine,midazolam inhalated agents:Sevoflurane (398 of 694; 57.4%), and thiopentha Mean anethesia duration: 110min	FSIQ score(KABC-II,German version;)
8	Glatz et al.	Sweden	JAMA Pediatr.	2017.1	3640	33514	159619	Nationwide cohort study	cross-linking the Swedish Medical Birth Register with the Swedish Patient Register(1973-1993)	＜4yr	Both sexes: 16yr Males: 16+18yr	Abdominal- & urological-, ear-nose-throat- & ophthalmological procedures; Orthopaedics & Plastic surgery	Not stated	(1)School grades (2)general intelligence test scores based on verbal and spatial cognitive testing
9	Davidson et al.	Australia	Lancet.	2016.1	LA：238;GA：294			International assessor-masked randomised controlled trial	who had inguinal herniorrhaphy, from 28 hospitals in Australia, Italy, the USA, the UK, Canada, the Netherlands, and New Zealand.(2007-2013)	up to 60 weeks postmenstrual age	2yr	inguinal herniorrhaphy	Awake-regional (RA) group (spinal only, caudal only, spinal-caudal combined according to local protocol) Anaesthetic and dosage available in paper. GA1 group: sevoflurane (induction), sevoflurane + Air/O2 (maintenance) Opioids or Nitrous oxide not allowed; for analgesia a regional could be added (ilioinguinal-iliohypogastric-, field-, caudal- block) mean anethesia duration:53min	(1)IQ(WPPSI-III Full Scale Intelligence Quotient score) (2)the composite cognitive score(BSID-III) (3)MacArthur-Bates CDI
10	Ing et al.	Australia	Pediatrics.	2012.9	321		2287	Retrospective cohort study	Western Australian Pregnancy Cohort (Raine)(1989-1992)	＜3yr	10yr	cardio-,thoracic- and neuro-surgery	No specifics stated	(1)language(CELF,CELF-R,CELF-E,CELF-T,PPVT) (2)cognition(SDMT,CPM) (3)behavior(CBCL) (4)motor function(MAND)
					52	206	1523
11	Wilder et al.	USA	Anesthesiology	2009.4	144	449	4764	Retrospective, population-based cohort study	a birth cohort of children born in Rochester, Minnesota(1976-1982)	＜4yr	Variable (depending on the date an individual first meets LD4 criteria) At the latest at 19yr	Any type of surgery or procedure in GA	Most anaesthetics included halothane and nitrous oxide;	LD
12	Nestor et al.	USA	J Pediatr Surg.	2017.6	64	non-surgical：63; surgical：171	129	Retrospective cohort study	the anaesthesia departmental database, University of Florida College of Medicine,USA(2010-2011)	＜1yr	mean 5.1yr	Any surgery or diagnostic procedure	GA1 most commonly induced with i.v. propofol, followed by inhaled Sevoflurane. Paralytics used in 42% of cases (rocuronium). Airway management: intubation in 79% of cases. Maintenance: sevoflurane or propofol. Per-operative analgesia: fentanyl i.v. Anaesthesia duration recorded.	psychiatric variables: (1)developmental delay (overall, including delayed mile stones),verbal or speech delay, gross motor delay, fine motor delay, global delay, social or behavioral interaction delay; (2)ASD,ADHD, anxiety, and sleep disturbances; (3)Need for speech therapy (ST), occupational therapy (OT), or physical therapy(PT),long-term need for a gastrostomy tube for feeding neurologic variab…
13	Conrad et al.	USA	J Child Neurol.	2017.3	iCLP:48，iCL:20,iCP:19		160	Retrospective cohort study	Children with cleft lip- and/or cleft lip palate were recruited from University of Iowa Cleft Clinic(2002-2005)	＜7	7.5-27.25 yr (mean=15.78 yr)	Correction of congenital isolated OC6: - Cleft lip- (CL) - Cleft palate- (CP) - Cleft lip-palate- (CLP) malformations	Not stated	(1)Cognitive measure: VIQ(WISC-III for age 7-17yr;WAIS-III for age≥18yr) (2)growth measure: height,head circumstance (3)brain measure: MRI imaging to obtain brain volumetric measures, intracranial volume, total brain tissue (total white matter and total grey matter), total cerebral volume (total frontal and total occipital volume), subcortical structures (caudate, putamen, and globus pallidum), a…
14	Backeljauw et al.	USA	Pediatrics.	2015.7	13	40	53	Retrospective matched-cohort study	Study subjects drawn from an existing cross-sectional MRI database including 5- to 18yr old volunteers.	＜4	not stated	ENT general surgery urology ophthalmology orthopaedics cardiac neurosurgery other	Volatile anaesthetic exposure quantified into minimum alveolar concentration over time (i.e., MAC-hour)	(1)OWLS;WISC-III for age 7-17yr;WAIS-III for age≥18yr (2)MRI
15	Birajdar et al.	Australia	Early Hum Dev.	2017.6	0	33	0	Retrospective cohort study	All full term and moderate to late preterm infants (≥32 weeks at birth) undergoing laparotomy at Princess Margaret Hospital for Children, Perth, Australia for malrotation under GA(2005–2014)	1-22d (mean 4.27d)	12m	Ladd procedure for intestinal malrotation	GA1 was defined as the use of intravenous or inhalational agents to achieve amnesia, analgesia, muscle paralysis, and sedation. Recorded intra-operative vital parameters (temperature, heart rate, respiratory rate, pulse oximeter saturation and end tidal carbon dioxide (etCO2)) continuously monitored.	(1)GMDS(locomotor, personal and social, hearing and speech, eye and hand coordination, and performance) sub-optimal developmental outcome,cerebral palsy, blindness,sensorineural deafness requiring hearing aids (2)mild developmental delay physical growth(weight,length,head circumference)
16	Terushkin et al.	USA	Dermatol Surg.	2017.4	33	0	0	Retrospective single-centre cohort study	Children treated at least 2x with laser surgery in GA during 2002-2012 at the Laser & Skin Surgery Center, New York	＜4	3.4-11.4yr (mean 7.6yr)	Laser surgery for vascular anomalies (port-wine stains and haemangiomas)	Inhalated agents: nitrous oxide,isoflurane i.v. agents: propofol	Parent interview: (1)birth history,school performance ,diagnoses of neurologic and psychiatric illnesses,pertinent family history (2)Neurodevelopmental disorders (ADHD, ASD, Asperger, conduct-/oppositional defiant-/personality-/emotional-/speech disorder, stuttering, Tourette, depression, anxiety, OCD（obsessive compulsive disorder）, behavioural problems, dyslexia, LD, mental retardation, language…
17	Lap et al.	Netherlands	Early Hum Dev.	2017.3-4	9	7	32	Retrospective cohort study	All infants with gastroschisis, treated at the University Medical Center Groningen (UMCG) between 1999 and 2006	Newborn	Exposed: 5-13yr(mean 8.5yr) Controls: 6-11yr(mean 6.0 yr)	Gastroschisis –surgical treatment with primary closure or construction of a silo	Not stated	(1)Cognition: verbal, performance，total intelligence(WISC-III-NL) selective visual attention, sustained auditory attention,response inhibition（TEA-Ch NL） auditory-verbal memory（AVLT） (2)Motor development: visuomotor integration（Nepsy-2-NL） (3)Behaviour: grade repetition and special or regular education(CBCL)
18	Yazar et al.	Australia	J Pediatr.	2016.2	33	94	707	Retrospective cohort study	participants of the Western Australian Pregnancy Cohort Study(Raine)	＜3	20yr	ocular surgery and/or diagnostic procedure	a predominance of halothane and enflurane; followed by increasing numbers of patients receiving isoflurane or sevoflurane	3 surrogate measures of visual function: visual acuity, refractive error, and thickness of retinal nerve fibre layer (RNFL) in young adulthood.
19	Seltzer et al.	USA	J Thorac Cardiovasc Surg.	2016.4	21		0	Observational cohort study	neonates <30days requiring cardiac surgery and previously enrolled in a prospective observational study	＜30d	5.6yr	Cardiopulmonary bypass(cardiac repair or palliation)	Induction: Fentanyl and pancuronium; Maintenance: fentanyl and isoflurane Either: regional perfusion (n=4) if hypoplastic left heart syndrome or deep hypothermic circulatory arrest.	(1)preoperation:EEG to access for seizures (2)during and after operation: EEG (3)follow-up neurodevelopment:VABS-II
20	Djurhuus et al.	Denmark	Acta Otolaryngol.	2016.7	549		15106	Retrospective Cohort study	Danish birth-cohort cohort(1986-1991); identification of subjects in the national patient register,the Danish civil registration system,the student register,the population’s education register and the Danish medical birth register	mean 9.4yr	15-16yr	Cholesteatoma surgery	No specifics stated	Average 9th grade marks, subject specific school marks,non-attainment of a 9th grade exam
21	Poor Zamany Nejat Kermany et al.	Iran	Paediatr Anaesth.	2016.1	46	22	47	Retrospective cohort study	in the Ophthalmology Department at Labbafinejad Hospital,Tehran, Iran in 2014(aged 5-16yr)	＜3	At least 6months since last exposure	Infantile glaucoma-patients	Sevoflurane maintaining BIS values of 40-60 (no further details stated) Anaesthesia duration no more than 45min	cognition(PVF test,SVF test,FDS test,BDS test)
22	Diaz et al.	USA	J Thorac Cardiovasc Surg.	2016.8	96		0	Subgroup analysis in prospective study (investigating effects of Apo lipoprotein E (APO-E) gene polymorphisms on neurodevelopmental outcome); data collected retrospectively	Subgroup analysis in prospective study (investigating effects of Apo lipoprotein E (APO-E) gene polymorphisms on neurodevelopmental outcome)	<6m	4-5yr	Staged reconstructive surgery for hypoplastic left heart syndrome	Total volatile anaesthetics agents exposure calculated using area under-the-curve method; converted to age-adjusted minimum alveolar concentration hours (MAC-hrs). Cumulative MAC-hrs exposure determined for each patient. (cumulative MAC-hrs: 0-35.3)	Cognition(WPPSI-III)
23	de Heer et al.	Netherlands	Anaesthesia.	2017.1	415		3026	Retrospective cohort study	data from the ‘Generation R Study’, a prospective cohort study from fetal life until young adulthood in a multi-ethnic urban population in Rotterdam, the Netherlands(2002-2006)	＜5yr	6yr	Not stated	(Anaesthesia charts available for 16%) Either agent used: propofol, sevo-/isoﬂurane, fentanyl, sufentanil, alfentanil.	IQ(SON-R):visuospatial ability,abstract reasoning
24	Taghon et al.	USA	Paediatr Anaesth.	2015.3	15		not-stated	Bidirectional cohort study	The Department of Perioperative Services Database(aged 10-17yr)	＜2yr	10-17yr	Non-cardiac, miscellaneous surgeries, mainly urologic and few general surgeries	Halothane, nitrous oxide, sodium thiopental; duration between 105–225min	(1)the blood-oxygen level-dependent (BOLD) fMRI signal (2)sustained attention and response control(The go/no-go paradigm)
25	Ko et al.	Taiwan,China	Eur J Anaesthesiol.	2015.5	5197		20788	a nationwide, retrospective matched cohort study	Data extracted from the National Health Insurance programme, collected by the NHIRD of Taiwan(2001-2010)	＜2yr	>2yr	Surgery on skin, limbs, head and neck; cardiac-, thoracic-, abdominal surgery and on nervous system.	sevofluorane	ASD
26	Hansen et al.	Denmark	Paediatr Anaesth.	2015.2	228		14698	nationwide unselected register-based follow-up study	Danish birth cohorts; Data used from 4 registers: Danish Demographic Database, Danish National Hospital Register, Integrated Database for Labour Market Research, Register of Compulsory School Completion Assessments and Test Scores compiled by the Danish Ministry of Education from school reports(1986-1990)	infant	15-16yr	Neurosurgical procedures: - ventriculo-peritoneal (VP-) shunt insertion for hydrocephalus, craniotomy for biopsies, tumours, bleedings, cysts, abscesses; - cranio-synostosis with/ without VP- shunt; repair of myelomeningocele or encephalocele with/ without a VP shunt.	Not stated	(1)mortality prior to June 1st, 2006 (2)average test scores at ninth grade,the proportion of children not attaining test scores.
27	Petráčková et al.	Czech Republic	Early Hum Dev.	2015.2	0	early repair:15 late repair:17	0	retrospective cohort study	Babies born in the Czech Republic between 2004- 2008 with a surgically repaired isolated cleft lip,recorded by the Department of Plastic Surgery at the University Hospital Kralovske Vinohrady (2004-2008)	early repair＜8d; late repair:3-10m	3-7yr	Cleft-lip repair	sevofluorane	(1)IQ（SON-R） (2)psychosocial development(CHQ50)
28	C. Ing et al.	Australia	Paediatr Anaesth.	2017.9	Total duration of GA： ≤25min：0 >25to≤35min：3 >35to≤60min：2 >60 min：16	Total duration of GA： ≤25min：36 >25to≤35min：40 ＞35to≤60min：36 >60 min：15	0	retrospective cohort study	Western Australian Pregnancy Cohort (Raine)(1989-1992)	＜3yr	10yr	myringotomies and tonsillectomies .etc	volatile anesthesia：nitrous oxide（99.3%），halothane（91.2%），isoflurane（15.5%）， enflurane（12.8%）	(1)language(CELF,CELF-R,CELF-E,CELF-T,PPVT) (2)cognition(CPM)
29	Yin et al.	China	Anaesthesia.	2014.2	propofol:30;sevoflurane:30		0	Observational prospective study (single centre)	patients of ASA physical status who were scheduled for elective hernia surgery, Department of Anesthesia, Second People’s Hospital of Wuhu, Wuhu, Anhui, China	7-13y	Preoperatively; 7 and 90 days postoperatively	Elective inguinal herniotomy	propofol;sevoflurane	WMS-Chinese Revision: immediate memory(FDS,BDS) short-term memory(image recalling,figure recognition, visual reproduction,verbal paried associates comprehension memory) long-term memory(forward counting,backward counting, accumulation)
30	Morriss et al.	USA	JAMA Pediatr.	2014.8	GA:2186;LA:784 multiple-explosure:1080 single-exoplosure:1890		9141	Retrospective cohort study	Patients enrolled in the Eunice Kennedy Shriver National Institute of Child Health and Human Development Neonatal Research Network (NRN) Generic Database (GDB) from 1998 through 2009 who had birth weights (BW) of 401–1500 g, survived 12 hours and were available for follow-up assessments at 18–22 months(1998-2009)	＜22m	18-22m(corrected age)	Not stated	Not stated	(1)death prior to accessment (2)neurodevelopmental impairment(BSID-III,BSID-II, GMFCS)
31	Ing et al.	Australia	Anesthesiology.	2014.6	112		669	Retrospective cohort study	Western Australian Pregnancy Cohort (Raine): children（1989-1992）	＜3yr	10yr	Miscellaneous surgical procedures, including cardio-thoracic- and neurosurgery	No specifics stated	(1)neuropsychological testing： RCPM, CELF,CELF-R,CELF-E,CELF-T (2)ICD-9 Codes: -behavioral disorder (ICD9-B)：ASD,psychological disorders,ADHS -language and cognitive disorders (ICD9-L/C): reading/language/arithmetical disorders, developmental delay,mental retardation -either behavioral or language and cognitive disorders (ICD9-B/L/C). (3)Academic Achievement Scores: WAMSE：numeracy, reading, spell…
32	Bong et al.	Singapore	Anesth Analg.	2013.12	100		106	Retrospective observational cohort study	Children born at full term between 1998 and 1999 and registered in the database of the Dept. of anaesthesia at KK Women’s and Children’s Hospital, Singapore as having sevoflurane GA1(1998-1999)	＜1yr	12yr	Minor surgeries (e.g. inguinal herniotomies, circumcisions, cystoscopies, pyloromyotomies)	Induction: i.v. thiopental / i.h. sevoflurane maintenance: sevoflurane (tracheal intubation or laryngeal mask)	(1)PSLE aggregate scores (2)LD
33	Schneuer et al.	Australia	Paediatr Anaesth.	2018.6	developmental assessment:12848 school test results:25032		developmental assessment:69308 school test results:127993	retrospective population-based record-linkage cohort study	Data on births:Perinatal Data Collection, a state-wide surveillance database of all births in NSW Data on procedures with a general anesthesia: the NSW Admitted Patient Data Collection, a census of all inpatient hospital admissions from NSW public and private hospitals Individual birth and hospital admission records for each child were probabilistically linked to their corresponding developmental…	＜4yr	school entry:5-6yr Grade-3:7-9yr	surgical procedures (urogenital, circumcision, abdominal, inguinal hernia, myringotomy,adenotonsillectomy,other nose, throat, dental, skin,respiratory, and musculoskeletal surgery), simple invasive procedures (biopsies, endoscopy with excision of tissue, drainage of abscess,skin tag excisions, simple incisions, closed reduction of fractures,laser therapy, and excision or debridement of soft tissu…	Not stated(relatively short duration)	(1)AvEDI:the Australian version of the Early Development Instrument (2)Grade-3 school test results(numeracy and reading)
34	Sprung et al.	USA	Mayo Clin Proc.	2012.2	64	286	5007	Retrospective cohort study	Children born in Rochester, Minnesota ,USA between Jan 1st 1976 – Dec 31st 1982 and born to mothers residing in the townships comprising Independent School District No. 535 (1976-1982)	＜2yr		Any type of surgery	Duration of GA1, anaesthetic agents used (inhalation, intravenous, sedatives), types of surgery or procedure, number of anaesthetic exposures before age 2yr were abstracted.	ADHD,LD
35	Flick et al.	USA	Pediatrics.	2011.11	64	286	700	Population based, matched cohort study	Children born in Rochester, Minnesota between Jan 1st 1976 – Dec 31st 1982 and born to mothers residing in the townships comprising Independent School District No. 535(1976-1982)	＜2yr	Variable, but at the latest at 19yr	Any surgery or diagnostic procedure requiring GA1	Most GAs1 included halothane (86%) and nitrous oxide (91%); (type of anaesthetics and cumulative duration of anaesthesia used referred in text)	(1)LD (2)receipt of an IEP-EBD,IEP-SL (3)the results of group administered tests of cognition and achievement: CAT:written language, mathe matics, phonics, and spelling; TCS:total cognitive scale,memory sub scale
36	Hansen et al.	Denmark	Anesthesiology	2011.5	0	2689	14575	Nationwide unselected register-based follow-up study	Danish birth cohorts from 1986 -1990; data used from 4 registers: Danish Demographic Database, Danish National Hospital Register, Integrated Database for Labour Market Research, Register of Compulsory School Completion Assessments and Test Scores compiled by the Danish Ministry of Education from school reports	＜1yr	15-16yr	Inguinal hernia repair	Not stated	9th-grade national test average,average teachers rating, nonattainment rates
37	DiMaggio et al.	USA	J Neurosurg Anesthesiol.	2009.1	383		5050	Retrospective cohort study	All children born in the state of New York between 1999 and 2001 and who were covered under the Medicaid system ‘Exposure’ was defined as the presence of an inpatient or outpatient principal or secondary ICD-944 procedure code related to hernia repair	12-48m	Within the inclusion period (1999-2002)	Surgical inguinal hernia repair	Not stated	Diagnostic codes according to ICD-9: -unspecified delay/behavioural disorder -mental retardation -ASD -language/ speech problems
38	Bartels et al.	Netherlands	Twin Res Hum Genet.	2009.6	1143		1143	Register based national cohort study	Twin pairs registered in the Young-Netherlands Twin Register born in the Netherlands between 1986-1995. Determination of zygosity and determination of outcome according to these and whether one, both or neither twin had been exposed(1986-1995)	<12yr (exposure prior to age 2-, 3-, 12 years registered separately)	12yr	Any procedure in GA	No specifics stated	(1)Educational achievement at the Dutch national CITO-elementary test:Language,Mathematics,Information Processing,World Orientation (2)Cognitive Problems/Inattention（CTRS-R）
39	Doberschuetz et al.	Germany	Neonatology	2016.3	40		40	Ambidirectional matched cohort study	All patients with gastrointestinal malformations (GIM) born June 2008 to April 2011 and surgical correction of GIM identified in the site database (n= 68)	<28d (mean 14.8 hours )	24months (corrected age)	Gastroschisis, omphalocele, intestinal atresia, intestinal malrotation, Hirschsprung’s disease, anal atresia, oesophageal atresia and congenital diaphragmatic hernia.	Not stated	BSID-II: (1)PDI:Gross motor skills,Fine motor skills (2)MDI:Nonverbal abilities,Verbal abilities
40	Zaccariello et al.	USA	Br J Anaesth.	2019.5	ClusterA:106 ClusterB:557 ClusterC:334			Population-based, retrospective cohort study	Birth cohort Olmsted County, Minnesota(1994-2007)	＜3yr	8-12 or 15-20yr	Otorhinolaryngogic-, Neurologic-, Urologic-, Orthopedic-, Plastics-, Cardiovascular- and some other surgeries	inhalated agents: sevoflurane,isoflurane i.v. agents:Thiopental Others:Nitrous oxide，opioids	(1)WASI (2)WRAML (3)CPT-II, Conners’s Continuous Performance Test II (4)DKEFs (5)CTOPP (6)Wisconsin Card Sort (7)Beery:Visual Perception,Motor Coordination, Visual Motor Integration (8)GPT (9)CBCL (10)BRIEF:Behavior Rating Inventory of Executive Function (11)CLDQ (12)ADHD
41	Bakri et al.	Saudi Arabia	Saudi J Anaesth.	2015.4-6	35	0	35	Matched- cohort study, single-centre	Children with history of 2 GA exposures; recruited at the preanaesthetic clinic prior to 3rd procedure.	1.5~5yr	not stated	miscellaneous surgical procedures, including arthrogram and Hip spica cast for Developmental Dysplasia of the Hip, polydactyly, syndactyly, cleft lip, burn graft, circumcision,orchidopexy, penile hypospadia,hernia, and dental rehabilitation	Premedication: oral midazolam 0.5mg/kg Induction: 5-8% sevoflurane by face mask; Intubation: atropine 10-20mcg/kg, fentanyl 1mcg/kg + atracurium 0.5mg/kg Maintenance: sevoflurane in O2-N20 50% mixture; relaxation reversed using neostigmine 50mcg/kg + atropine 10-15mcg/kg; awake extubation	(1)CBCL (2)DSM-IV（anxiety,depression,sleep disturbances,ADHD etc）
42	Gano et al.	USA	Pediatr Res.	2015.9	18	25	94	prospective cohort study	Preterm newborns admitted to the intensive care nursery at the University of California, San Francisco (UCSF) from January 1998 to April 2009 who were enrolled in a prospective study of neonatal MRI	GA for surgery before term equivalent age (<42 weeks)	3~6yr	Abdominal- (laparotomy, hernia repair, gastrostomy tube), urological-, ophthalmologic procedures; patent ductus arteriosus ligation, ventricular shunt – reservoir or revision	Inhalational anaesthetics (sevoflurane, isoflurane, halothane, nitrous oxide), intravenous agents (propofol, ketamine, midazolam, pentobarbital), and opioids (fentanyl, morphine). Doses and concentrations not consistently available	WPPSI-III:the mean full-scale IQ, performance,verbal IQ
43	Garcia et al.	Canada	Paediatr Anaesth.	2014.3	benzodiazepine：53； chloral hydrate：69		0	Prospective follow-up study	infants admitted to the paediatric intensive care unit after surgery for complex congenital heart disease at the Stollery Children’s Hospital April 2003 and December 2006	≤6w	5yr	Surgery for congenital heart surgery on CPB	Amount of sufentanil, remifentanil, fentanyl, morphine administered pre-, intra-, postoperatively was converted to the equivalent morphine dose (sufentanil 0.084 mg = fentanyl 1 mg = remifentanil 1 mg = morphine 100 mg). Amount of midazolam, lorazepam administered was converted to the equivalent midazolam dose (midazolam 2.5 mg = lorazepam 1 mg). The dose and duration of isoflurane, sevoflurane, …	(1)WPPSI-III: full-scale intelligence quotient (FSIQ) performance IQ(PIQ) verbal IQ (VIQ) (2)VMI (3)ABAS-II:GAC
44	Andropoulos et al.	USA	Paediatr Anaesth.	2014.3	0	59	0	Retrospective cohort study	neonates with congenital heart disease and previously enrolled in a prospective study at the Baylor College of Medicine.	<30d	MRI7: preoperatively and 7-days postoperatively BSID-III24:1yr	Neonatal cardiac surgery for correction of the following 1) single ventricle lesions (hypoplastic left heart syndrome or variant) 2) two-ventricle lesions (D-transposition of the great vessels (arterial switch operation), interrupted aortic arch with ventricular septal defect; 3) complete two-ventricle anatomic repair (truncus arteriosus, tetralogy of Fallot, total anomalous pulmonary venous retu…	Correcting cardiothoracic surgery: standardized use of isoflurane, fentanyl, midazolam. Bypass flow rates of 150ml/kg/min Blood gas management used for all cases (for reconstruction of aortic arch: regional cerebral perfusion at 18degress C no longer than 20min). Any surgery during the first 12 months of life at the institution – all volatile and intravenous anaesthetics recorded. Doses calculate…	(1)MRI:preoperative and 7-day postoperative (2)BSID-III:cognitive, motor, and language composite scores
45	Ko et al.	Taiwan,China	Paediatr Anaesth.	2014.7	1274	2019	13172	Nationwide retrospective matched cohort study	Data extracted from the National Health Insurance programme, collected by the NHIRD33 of Taiwan (covering 99% of the population)	<3yr	Diagnosis of ADHS before Jan 1st 2011	Not stated	Not stated	ADHD
46	Hansen et al.	Denmark	Paediatr Anaesth.	2013.1	779		14665	Retrospective cohort study Nationwide unselected register-based follow-up study	Danish birth cohorts from 1986 -1990; data used from 4 registers: Danish Demographic Database, Danish National Hospital Register, Integrated Database for Labour Market Research, Register of Compulsory School Completion Assessments and Test Scores compiled by the Danish Ministry of Education from school reports	<3m	15-16yr	Pyloric stenosis (PS)	Not stated	9th-grade national test average,average teachers rating,non-attainment rates
47	Fan et al.	China	J Anesth.	2013.8	0	72	0	Single-centre, prospective study	Children scheduled for surgical strabismus correction in GA1 at the Eye & ENT Hospital of Fudan University included.	4~7	postoperatively 1 + 6 months	Strabismus surgery	Induction: inhalation (sevoflurane, 8 %; oxygen flow, 8 l/ min; oxygen concentration, 100 %), atropine 0.01mcg/kg, fentanyl 2-4mcg/kg, rocuronium 0.4mg/kg Maintenance: sevoflurane 3%; minimum alveolar concentration maintained between 1.1 - 1.3	cognition(WPPSI-III):1 day before the operation, 1 month after the operation, and 6 months after the operation
48	Ing et al.	Australia	J Neurosurg Anesthesiol.	2017.7	34	122	963	Retrospective cohort study	the Western Australian Pregnancy Cohort Study (Raine)(1989-1992)	<3yr	10yr	Myringotomy,Orchiopexy, hypospadias, circumcision, andother minor urological procedures,Inguinal and umbilical hernia,Tonsillectomy and adenoidectomy,Dental procedure,Procedures on mouth/tongue, nasal airway,and cleft lip and palate repair,Minor skin and nail procedure,Abdominal procedure with laparotomyor laparoscopy Foot or hand surgery Laryngoscopy,bronchoscopy, ortracheostomy placement or rem…	Not stated	(1)language(CELF,CELF-R,CELF-E,CELF-T,PPVT) (2)cognition(SDMT,CPM) (3)behavior(CBCL) (4)motor function(MAND)
49	Clausen et al.	Denmark	Cleft Palate Craniofac J.	2017.7	509		14677	Nationwide register-based follow-up study	Danish birth cohorts from 1986 -1990; data used from 4 registers: Danish Demographic Database, Danish National Hospital Register, Integrated Database for Labour Market Research, Register of Compulsory School Completion Assessments and Test Scores compiled by the Danish Ministry of Education from school reports	CL,PL：<2.8m CLP：<22m	15-16yr	cleft operation	Not stated	test score in the Danish standardized ninth-grade exam, proportion of nonattainment
50	Kalkman et al.	Netherlands	Anesthesiology	2009.4	0	243	0	retrospective cohort study	children un dergoing pediatric urological surgery in the years 1987,1991, 1993, and 1995 in the academic pediatric hospital of the University Medical Center Utrecht	<6yr	15yr	pediatric urological procedures	predominantly inhalation-based and consisted of mask induction with a volatile agent (halothane, enflu rane, or isoflurane) combined with nitrous oxide and anopioid (fentanyl or sufentanil). Total intravenous anes thesia with propofol and an opioid was rarely used. For selected procedures, general anesthesia was sometimes supplemented with a caudal epidural block	CBCL
51	C. Ing et al.	USA	Anesth Analg.	2020.9	0	42687	213435	retrospective propensity score-matched cohort study	Medicaid Analytic eXtract (MAX) files from the Centers for Medicare and Medicaid Services (CMS) and included children enrolled in Texas (TX) and New York (NY) Medicaid from 1999 to 2010	＜5yr	767 days post-procedure	pyloromyotomy, inguinal hernia repair, circumcisions outside the perinatal period, and tonsillectomy and/or adenoidectomy	Not stated	persistent ADHD medication use
52	Kayaalp et al.	Turkey	Paediatr Anaesth.	2006.8	corrosive esophagitis at lease 5 GAs:23	chronic renal disease：20 (50% GA once, 50% not)		retrospective cohort study	not stated	corrosive esophagitis:4-18yr(mean 8.1yr) chronic renal disease:5-15yr(mean 10.5yr)	not stated	the treatment of corrosive esophagitis	premedication: midazolam(nasally or IV 0.2 mg/kg, oral 0.5 mg/kg) inhalation+i.v.: sevoflurane 8% in 50% of O2–N2O(terminated when consciousness was lost and IV access obtained); Induction: fentanyl(2–5 ug/kg and 2-3 mg/kg propofol and atracurium 0.5 mg/kg Maintenance: propofol 8 mg/(kg·h)and 50% of O2–N2O；remifentanil in fusion 0.5 ug/（kg·min) Analgesia：NSAID or tramadol;morphine,PCA, epidural a…	(1)DSM-IV (2)CBCL (3)CDI
53	Jacola et al.	USA	J Pediatr.	2020.8	101	0	0	prospective study	St. Jude Children’s Research Hospital	10.1yr(mean age)	13.1yr（mean age）	medulloblastoma	inhalation, intravenous, or mixed (inhalation and intravenous) routes. Most commonly used： Inhalation：sevoflurane with 91.9% of patients receiving it at least once Intravenous：propofol and fentanyl, with 100% of patients receiving these agents at least once 21.1h(mean cumulative duration）	intelligence, attention, working memory, processing speed,and reading（Woodcock Johnson Tests of Cognitive Abilities, 3rd Edition, and the Broad Reading cluster score from the Woodcock Johnson Tests of Academic Achievement, 3rd Edition）
54	Warner et al.	USA	Anesth Analg.	2021.7	0	1054	5339	retrospective cohort study	Birth cohort Olmsted County, Minnesota(1976-1982;1996-2000)	＜3yr	18y	Otorhinolaryngogic-, Neurologic-, Urologic-, Orthopedic-, Plastics-, Cardiovascular- and some other surgeries	inhalated agents: sevoflurane,isoflurane i.v. agents:Thiopental Others:Nitrous oxide，opioids	(1)ADHD (2)LD (3)IEP
55	Walkden et al.	England	Anethesiology	2020.11	212	1110	12111	retrospective, population-based birth cohort study	Avon Longitudinal Study of Parents and Children, a prospective, population-based birth cohort born between 1991 and 1993 in southwest England. (1991-1993)	<4yr	7-16yr	Not stated	Not stated	(1)educational outcomes: -Key stage 2/3 English, mathematics and science,Nonentry to key stage 2/3 exams -Key stage 4 total points score, Number of key stage 4 examentries, Key stage 4 English and mathematics A*,A,B,or C grade,Key stage 4 science 2 "good"passes (C grade or above) (2)cognitive outcomes: -WISC: global IQ, verbal IQ -Sky search task, 0pposite worlds task, Counting span task -WASI: g…
56	Kobayashi et al.	Japan	Environ Health Prev Med.	2020.7	161	746	63232	retrospective cohort study	the Japan Environment and Children’s Study (JECS), a large-scale birth cohort study(2011-2014)	<1y	1yr	Not stated	Not stated	the Japanese translation of ASQ-3:communication, gross motor, fine motor, problem solving, and personal–social
57	Walsh et al.	USA	Pediatr Res	2021.4	25		59	a prospective longitudinal observational cohort study	Very preterm infants were recruited from a level III Neonatal Intensive Care Unit (NICU) in St. Louis, Missouri, between 2007 and 2010 into a prospective longitudinal observational cohort study of VPT infants undergoing MRI at TEA, and long-term neuro-developmental outcome	27w	MRI: TEA Neurodevelopment: 2y(corrected age)	not stated	not stated	(1)MRI:brain tissue volumes, cortical surface area, gyrification index,white matter microstructure (2)BSID-III
58	Block et al.	USA	Anesthesiology	2017.11	17		17	retrospective cohort study	Department of Anesthesia (University of Iowa, Iowa City, Iowa) billing records were searched for male patients within the targeted current age range (table 1) who had anesthesia for one or more of the four groups of operations during infancy. To recruit potential control subjects who were not exposed to anesthesia and surgery during infancy, University of Iowa Hospitals and Clinics medical charts…	＜1yr	12.3-15.2yr	circumcision (older than 28 days), inguinal hernia repair and orchiopexy (with or without hernia repair), pyloromyotomy, tympanostomy	inhalted agents:Nitrous oxide, Sevoflurane, lsoflurane, Halothane, Desflurane	fMRI:Whole Brain Tissue-type Volumes,Regional White Matter Volumes,Diffusion Tensor Imaging
59	Zhang et al.	China	BMC Anesthesiology	2017.12	＜1h:49; 1-3h:51; ＞3h:79		30	Prospective cohort study	children aged 6–12 years who had sched uled orthopedic surgery under general anesthesia in Shanghai Xinhua Hospital from 2009 to 2015	6-12yr	preoperatively; 1m,3m,1y postoperatively	orthopedic surgery	Not stated	IQ：RSPM
60	Banerjee et al.	USA	JAMA Oncol.	2019.1	212	0	0	retrospective observational study	A cohort study of 212 survivors of childhood acute lymphoblastic leukemia who received treatment between July 7, 2000, and November 3,2010, and follow-up at a mean (SD) of 7.7 (1.7) years post diagnosis, was conducted at an academic medical center	mean 6.66yr	post diagnosis 5 years, >8yr	Not stated	Anesthetic Agent: Propofol,Fentanyl,Fluranes, Glycopyrrolate,Pentobarbital sodium, Meperidine hydrochloride, Midazolam hydrochloride, Morphine sulfate, Rocuronium bromide, Diazepam, Neostigmine methylsulfate, Ketamine hydrochloride, Vecuronium bromide, Atropine,Cisatracurium besylate, Ephedrine hydrochloride, Succinylcholine chloride	(1)Neurocognitive measures: attention, processing speed, executive function, and intelligence (2)MRI: Brain volumes, cortical thickness, diffusion tensor imaging of the whole brain, corpus callosum, frontal lobes, parietal lobes
61	O'Leary et al.	Canada	JAMA Pediatric	2019.1	209+382	525+1964	8184pairs+ 2346	retrospective sibling-matched cohort study	All eligible children in public and Catholic schools in Ontario, Canada, from 2004 through 2012	＜2yr：43.6% ＞2yr：56.4%	5-6yr	Ear and mastoid (1173 [38.1%]), oral cavity and pharynx (1035 [33.6%]),male genital organs (461 [15.0%]), and musculoskeletal (427[13.9%])	Not stated	EDI:5 major domains (physical health and well-being, social knowledge and competence, emotional health and maturity, language and cognitive development, and communication skills and general knowledge)
62	Ing et al.	USA	Anesth Analg.	2017.12	0	38943	192465	An observational cohort study	a longitudinal dataset constructed by linking individual-level Medicaid claims from Texas and New York from 1999 to 2010	<5yr (≤28 days old, >28 days and ≤6 months, >6 months and ≤1 year, and 6 month age intervals between >1 year old and ≤5 years old)	not stated	pyloromyotomy, inguinal hernia, circumcision outside the perinatal period, or tonsillectomy and/or adenoidectomy	Not stated	ICD-9:any mental disorder, or specifically developmental delay (DD) such as reading and language disorders, and ADHD
63	Green et al.	USA	Minerva Anestesiol.	2015.12	19	7	20	a retrospective autopsy-based study	Autopsy reports from the archived files of the Department of Pathology and Laboratory Medi cine, St. Christopher’s Hospital for Children corresponding to the period of 2003 to 2011	explosure:23d non-explosure:9d	autopsy	Not stated	inhalation agents:Sevoflurane,Desflurane, Isofluran,Halothane Intravenous agents: Fentanyl,Rocuronium,Propofol,Pancuronium, Morphinc Nitrous oxide mean time of duration:452 minutes (SD 512 min) and a range of 40-2280 minutes.	The autopsy results examined the presence of twelve different histopathological parameters reflecting morphologic changes in thirteen regions of interest in the central nervous system.
64	McCann et al	Australia	Lancet.	2019.2	GA:242;LA:205		0	International assessor-masked randomised controlled trial	28 hospitals in Australia, Italy, the USA, the UK, Canada, the Netherlands, and New Zealand.(2007-2013)	less than 60 weeks’ postmenstrual age	5yr	Inguinal hernia repair	Awake-regional (RA) group (spinal only, caudal only, spinal-caudal combined according to local protocol)Anaesthetic and dosage available in paper.GA1 group: sevoflurane (induction), sevoflurane + Air/O2 (maintenance) Opioids or Nitrous oxide not allowed; for analgesia a regional could be added (ilioinguinal-iliohypogastric-, field-, caudal- block) median duration:54min	(1)FSIQ(WPPSI-III) (2)attention and executive function(NEPSY) (3)WIAT-II (4)developmental issues(Speech or language,Psychomotor issues:ABAS-II,developmental delay:CBCL) (5)ADHD,ASD (6)Hearing abnormality,Visual defect of any type in either eye (7)Cerebral palsy
65	Brévaut-Malaty et al.	France	Children (Basel)	2022.4	85 to sevoflurane;18 without sevoflurane EPT children(extremely pre-term)			A Cross-Sectional Observationnal Study	the GPQOL study published in 2018:EPTs born prior to 28 weeks GA, between 1 January 2004 and 31 December 2006	Neonatal period(before 45weeks GA)	7-9yr	NEC, PDA,ROP, and inguinal hernia	sevofluorane duration:7.6-17.5d	Primary: (1)Motor skills(Touwen Infant neurological examination) (2)short perceptual organization and memory,FSIQ(WISC IV,Rey figure) (3)attention and executive functions(NEPSY) Secondary: (4)Cerebral palsy (CP)(Touwen results:developmental coordination disorder) (5)Severe disability(FSIQ,Touwen)
66	Shi et al.	USA	Br J Anaesth.	2021.12	23	38	0	prospective longitudinal study	Mayo Clinic (Rochester, MN, USA)	2.5-6yr	preoperatively, 1-2 weeks postoperatively, and 3 months postoperatively	most common: ENT procedures,including tonsillectomy and myringotomy with tympanostomy tube placement	about half:oral midazolam, fentanyl and propofol dexmedetomidine median duration:75min	(1)processing speed(WPPSI-IV), (2)working memory(WPPSI-IV) (3)fine motor skills(Mullen fine motor scale and Purdue Pegboard)
67	Laporta et al.	USA	J Autism Dev Disord.	2021.1	499ASD,998controls			retrospective population-based birth cohort study	Birth cohort Olmsted County, Minnesota(1976-2000)	＜3yr	not stated	most frequent: ear, nose and throat, general and urologic	Most frequent:halogenated inhalational agent duration:30-155min	ASD(DSM-IV)
68	Yang et al.	Taiwan,China	Children (Basel)	2021.9	2261		4522	retrospective national population cohort Study	The National Health Insurance Research Database(NHIRD) of Taiwan(1997-2008)	＜3yr	before December 31,2013	Not stated	inhalation	ICD-9 codes: -ASD -intellectual disability -developmental delay -ADHD
69	Feng et al.	Taiwan,China	PLOS ONE	2020.9	5576	5881	22914	A retrospective national population-based cohort study	a longitudinal dataset spanning 2000 to 2013 from the Taiwan National Health Insurance Research Database(NHIRD)	＜2yr	before December 31,2013	Dental treatment:45.42% General surgery:43.46% Urology:8.82% Ophthalmology:0.01% Other:0.01%	＜2h：n=2449 2-4h：n=3494 ＞4h：n=5514 type not stated	ICD-9 codes:developmental delay
70	Zhou et al.	China	BMC Pediatr.	2021.4	GA:129;LA:144		0	prospective, equivalence,controlled trial	China(2019.2.1-2019.4.31)	＜7yr	6m after surgery	dental procedure	sevoflurane-based GA or LA duration:130-160min	Neurocognition(WPPSI-IV(CN)):FSIQ
71	Partanen et al.	USA	Eur J Cancer.	2021.5	107	0	0	prospective longitudinal study	St. Jude Children’s Research Hospital(2003-2013)	10.2yr(mean age)	after surgery and <2 weeks of start_x0002_ing radiation therapy and annually for 5 years	medulloblastoma	intravenous, inhalation, or mixed methods. The most common agents: Intravenous:propofol and fentanyl(100% of patients) Inhalation:sevoflurane (91% of patients) 20.4h(mean duration)	intelligence, attention, working memory, processing speed（Woodcock Johnson Tests of Cognitive Abilities, 3rd Edition)
72	Arana Håkanson et al.	Sweden	PLOS ONE	2020.1	485		4835	retrospective cohort study	Patients born 1976 to 2002 that underwent abdominal surgery during infancy at a pediatric surgical center were matched to 10 randomly selected individuals from the Swedish Medical Birth Register	＜1yr(70%neonatal period:< 44 g estational weeks）	28yr（mean age）	abdominal surgery（pyloric stenosis most common）	80min(mean duration) type not stated	(1)ADHD：ICD-10 (2)Edutional level (3)disposable income
